# Supplementary material for: Preparation of a Fe3O4–Au–GO nanocomposite for simultaneous treatment of oil/water separation and dye decomposition
Source: Royal Society of Chemistry journal article supplement (doi:10.1039/c6nr05633d), 2016-01-01
Supplement: c6nr05633d1.pdf [file c6nr05633d1.pdf]

## **Preparation of Fe<sub>3</sub>O<sub>4</sub>-Au-GO Nanocomposite for Simultaneous Treatment of Oil /Water Separation and Dye Decomposition**

Ying-Shuai Wang,<sup>a</sup> Yan Wang,<sup>a</sup> Hong Xia,<sup>\*,a</sup> Gong Wang,<sup>a</sup> Zhen-Yu Zhang,<sup>a</sup> Dong-Dong Han,<sup>a</sup> Chao Lv,<sup>a</sup> Jing Feng,<sup>a</sup> and Hong-Bo Sun<sup>\*, a</sup>

<sup>a</sup> State Key Laboratory on Integrated Optoelectronics, College of Electronic Science and Engineering, Jilin University, 2699 Qianjin Street, Changchun 130012, P.R.China.

E-mail: [hxia@jlu.edu.cn](mailto:hxia@jlu.edu.cn) [hbsun@jlu.edu.cn](mailto:hbsun@jlu.edu.cn)

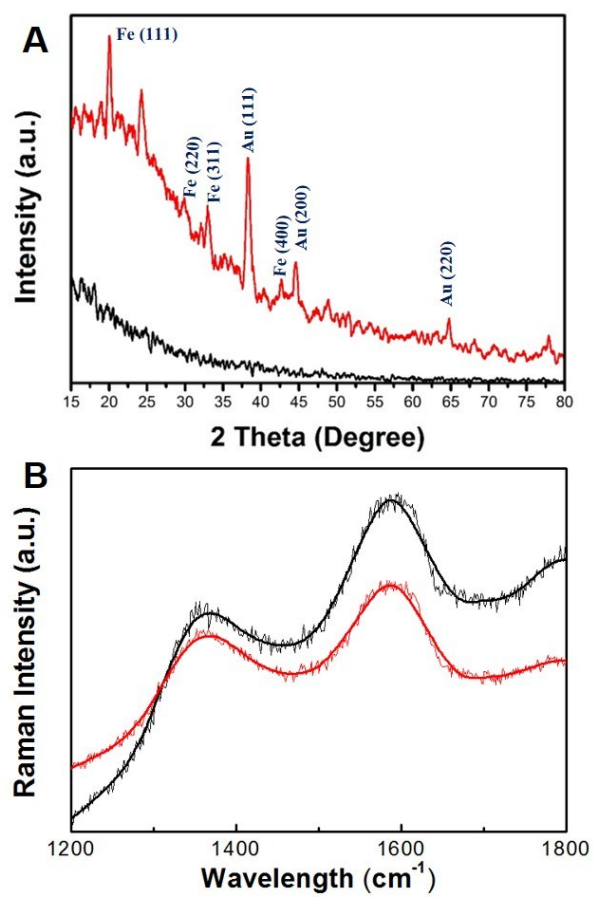

**Figure S1** (A) XRD pattern and (B) Raman spectra of GO (Dark) and Fe<sub>3</sub>O<sub>4</sub>-Au-GO nanocomposite (Red)

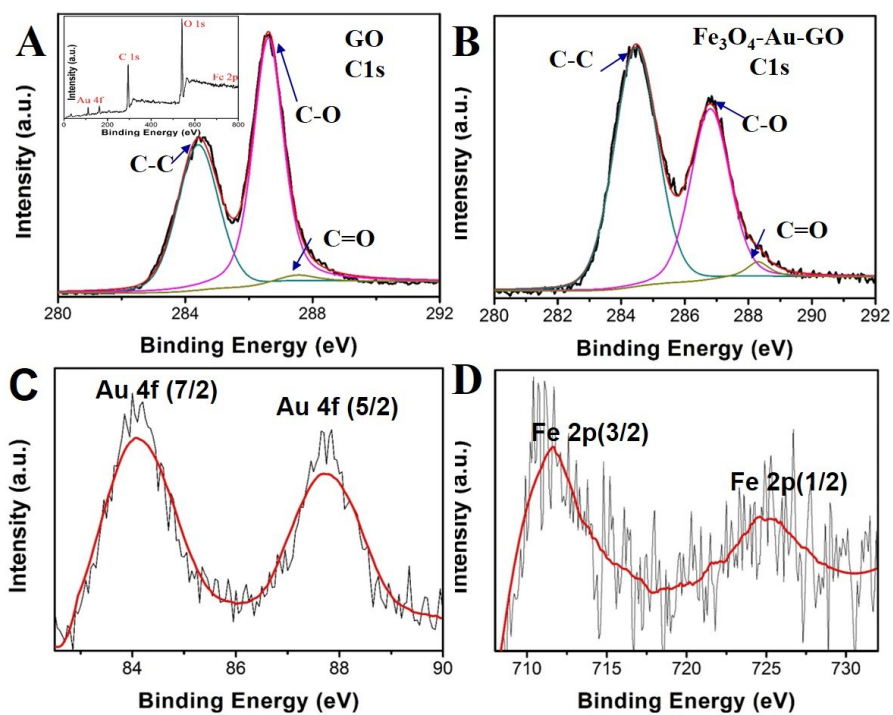

**Figure S2** High-resolution XPS C 1s spectra of (A) GO, (B) Fe<sub>3</sub>O<sub>4</sub>-Au-GO and (C); high-resolution XPS Au 4f (D) Fe 2p spectrum of Fe<sub>3</sub>O<sub>4</sub>-Au-GO, the inset is XPS spectra of Fe<sub>3</sub>O<sub>4</sub>-Au-GO nanocomposite

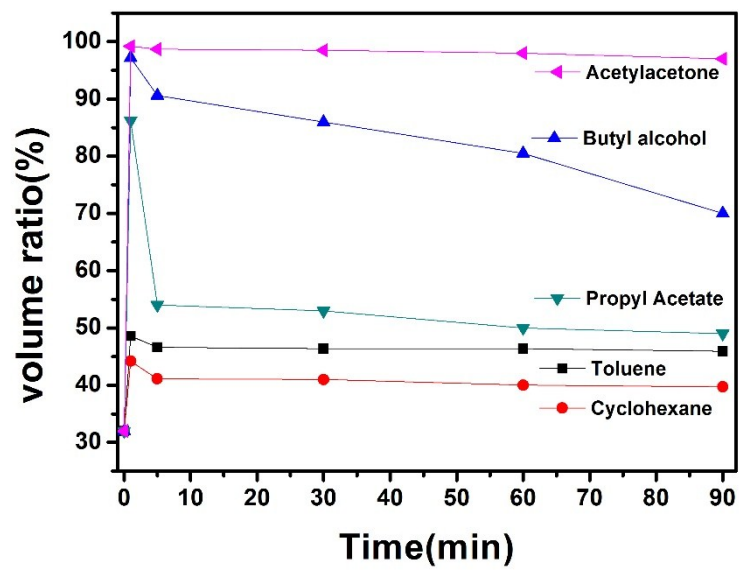

**Figure S3** The relationship of assembly volume with time in the reaction
